# Supplementary material for: The Profile of the Obstetric Patients with SARS-CoV-2 Infection According to Country of Origin of the Publication: A Systematic Review of the Literature
Source: J Clin Med. 2021 Jan 19;10(2):360. doi: 10.3390/jcm10020360 (PMC7833390; doi:10.3390/jcm10020360)
Supplement: Supplementary file 1 [file jcm-10-00360-s001.xlsx]

## Sheet: Table 1
												Maternal characteristics					Obstetric characteristics			Complementary maternal studies								Maternal management									Maternal -perinatal outcomes
Author	Publication date	Start of recruitment	Ending of recruitment	Type of study	Uni/Multicentre	Ciudad	Country	Total number of patients (n)	With symptomps (n)	No symptomps (n)	Universal screening (Y/N)	Maternal age	Tobacco	Maternal morbidities	BMI	Nuliparous	Onset of symptomps	Gestational morbidities	GA at triage	RT- PCR result	Radiological exam	Pneumonia	Analitical disorders	Leukocytosis	Lymphopenia	Platelets	LDH	Maternal treatment	Antiviral	Antibiothics	Esteroids	Anticoagulants	Interferon	Admission ICU	Oxygenotherapy	Mecanical ventilation	Maternal mortality	GA delivery	Vaginal delivery	C-section	Pematurity	Admission NICU	Birthweight	Apgar 5 min	Neonatal asphyxia	Perinatal death(sí/no) %	Vertical transmission (%)	Breastfeeding
Chen L	2020	2019-12-08	2020-03-20	Case series	Multicenter	Wuhan	China	118	95	6	No	31	n.r.	n.r.	n.r.	52	Pregnancy	n.r.	3T 64%	Positive	CT	79	n.r.	n.r.	44	n.r.	n.r.	n.r.	n.r.	n.r.	n.r.	n.r.	n.r.	0.85	n.r.	0.85	No	n.r.	7	92.6	21	n.r.	n.r.	9	No	No	No	n.r.
Yan J	2020	2020-01-20	2020-03-24	Case series	Multicenter	25 centers	China	116	89	27	No	30.8	n.r.	n.r.	n.r.	55.2	Pregnancy	15.5	38	Positive	CT	96.3	n.r.	2.6	44	n.r.	n.r.	94	54.3	94	31.9	n.r.	n.r.	6.9	n.r.	5.2	No	38.4	14.1	85.9	21.2	47	3108	10	1	1	No	n.r.
Wu Y	2020	2020-01-30	2020-03-10	Case series	Multicenter	Wuhan	China	29	14	15	No	29.6	n.r.	n.r.	24.1	82.8	Pregnancy	37.9	n.r.	Positive	CT	100	n.r.	34.5	31.0	n.r.	53.5	n.r.	n.r.	n.r.	n.r.	n.r.	n.r.	No	n.r.	No	No	35-41	6.9	93.1	10.3	60	n.r.	n.r.	No	No	27.8	n.r.
Qiancheng X,	2020	2020-01-15	2020-03-15	Case series	Single-centre	Wuhan	China	28	28	0	No	30	n.r.	10.7	n.r.	n.r.	Pregnancy	10.7	38	Positive	CT	92.9	n.r.	35.7	28.6	7.1	16	85.7	75	85.7	14.3	n.r.	0	n.r.	n.r.	n.r.	No	38	22.7	77.3	4.3	n.r.	3130	n.r.	No	No	No	n.r.
Wu X	2020	2019-12-31	2020-03-07	Case series	Single-centre	Wuhan	China	23	8	15	No	29	n.r.	17.4	n.r.	n.r.	Pregnancy	17.4	6--40	Positive	CT	100	n.r.	n.r.	n.r.	n.r.	n.r.	n.r.	n.r.	n.r.	n.r.	n.r.	n.r.	n.r.	n.r.	n.r.	No	38	10	90	15	n.r.	n.r.	9	4.3	No	No	n.r.
Chen Y	2020	2020-01-20	2020-02-29	Case series	Multicenter	Wuhan	China	21	21	0	No	29	n.r.	33.3	n.r.	n.r.	Pregnancy	14.3	>=37	Positive	CT	100	n.r.	9.5	19.1	0	9.5	100	100	90.5	19.1	4.8	n.r.	n.r.	9.5	n.r.	No	>=37	23.8	76.2	0	No	n.r.	n.r.	n.r.	No	No	n.r.
Liu W	2020	2020-01-31	2020-02-29	Case series	Multicenter	Wuhan	China	19	18	1	No	31	n.r.	n.r.	n.r.	n.r.	Pregnancy	21.9	37	Positive	CT	100	n.r.	89.5	0	0	n.r.	n.r.	31.6	n.r.	n.r.	n.r.	n.r.	n.r.	n.r.	n.r.	No	39	5.3	94.7	10.5	100	3293	9	No	No	No	n.r.
Zhang L	2020	2020-01-30	2020-03-01	Case series	Single-centre	Wuhan	China	18	18	0	No	29.1	n.r.	n.r.	n.r.	n.r.	Pregnancy	88.9	38	Positive	CT	94	n.r.	39	44	n.r.	28	100	100	n.r.	n.r.	n.r.	n.r.	n.r.	100	n.r.	No	35-41	6	94.4	17	n.r.	3181	n.r.	6	No	No	n.r.
Wei L	2020	2020-01-19	2020-03-02	Case series	Single-centre	Wuhan	China	17	15	2	n.r.	33	n.r.	0	n.r.	n.r.	Pregnancy	n.r.	3T 76%	Positive	CT	100	n.r.	24	42	35	40	76	76	24	n.r.	n.r.	n.r.	No	35	0	No	38	9.1	90.9	18.2	No	3174	9	No	No	No	n.r.
Khan S	2020	2020-01-25	2020-02-15	Case series	Single-centre	Hubei	China	17	17	9	No	29.3	n.r.	n.r.	n.r.	n.r.	Pregnancy	n.r.	38	Positive	CT	29.4	n.r.	47.1	23.5	n.r.	n.r.	100	94	100	n.r.	n.r.	n.r.	n.r.	n.r.	n.r.	No	38	0	100	18	n.r.	3104	10	No	No	11.8	n.r.
Chen R	2020	2020-01-30	2020-02-23	Case series	Single-centre	Wuhan	China	17	13	4	No	29.4	n.r.	n.r.	24.8	n.r.	Pregnancy	47.1	>=37 82.4	Positive	CT	100	n.r.	35.3	29	n.r.	n.r.	n.r.	n.r.	n.r.	n.r.	n.r.	n.r.	n.r.	n.r.	n.r.	No	>=37 82.4	0	100	17.6	100	3192	10	No	No	No	n.r.
Zhang L	2020	2020-01-30	2020-02-17	Case control study	Single-centre	Wuhan	China	16	16	0	No	29.3	n.r.	n.r.	n.r.	n.r.	Pregnancy	62.5	n.r.	Positive	CT	6.3	n.r.	n.r.	n.r.	n.r.	n.r.	n.r.	n.r.	n.r.	n.r.	n.r.	n.r.	6.3	n.r.	6.3	No	38-39	0	100	18.8	n.r.	3140	n.r.	n.r.	n.r.	No	n.r.
Zeng Y	2020	n.r.	2020-02-16	Case series	Single-centre	Wuhan	China	16	14	2	No	31	n.r.	31.3	n.r.	56.3	Pregnancy	50	37	Positive	CT	56.3	n.r.	n.r.	n.r.	n.r.	n.r.	100	100	100	37.5	n.r.	n.r.	No	43.8	No	No	37+5	25	75	18.8	75	3175	8.9	n.r.	No	No	n.r.
Li N	2020	2020-01-24	2020-02-29	Case control study	Single-centre	Hubei	China	16	12	4	No	30.9	n.r.	68.8	n.r.	n.r.	Pregnancy	68.8	33+6-40+4	Positive	CT	100	n.r.	n.r.	12.5	n.r.	n.r.	100	25	100	0	n.r.	n.r.	No	n.r.	No	No	38	12.5	87.5	23.5	n.r.	3067	10	No	No	No	n.r.
Liu D	2020	2020-01-20	2020-02-10	Case series	Single-centre	Wuhan	China	15	15	0	No	32	n.r.	6.7	n.r.	n.r.	Pregnancy	13.3	32	Positive	CT	100	80	n.r.	80	n.r.	n.r.	100	73.3	100	n.r.	n.r.	n.r.	No	93.3	No	No	n.r.	9.1	90.9	27.3	n.r.	n.r.	9	No	No	No	n.r.
Liu Y	2020	2019-12-08	2020-02-25	Case series	Single-centre	Wuhan	China	13	12	1	No	29.7	n.r.	0	n.r.	n.r.	Pregnancy	38.5	3T 84.6%	Positive	n.r.	n.r.	n.r.	n.r.	n.r.	n.r.	n.r.	n.r.	n.r.	n.r.	n.r.	n.r.	n.r.	7.7	n.r.	7.7	No	36	0	100	46	n.r.	n.r.	10	No	No	No	n.r.
Yan H	2020	2020-01-20	2020-03-05	Case control study	Single-centre	Wuhan	China	13	13	0	No	30.2	n.r.	n.r.	20.4	n.r.	Pregnancy and puerperium	n.r.	38+2	Positive	CT	92.3	n.r.	n.r.	n.r.	n.r.	n.r.	n.r.	n.r.	n.r.	n.r.	n.r.	n.r.	n.r.	n.r.	n.r.	No	38+2	30.8	69.2	n.r.	n.r.	3063	n.r.	No	No	0	n.r.
Wu Y	2020	2020-01-31	2020-03-09	Case series	Single-centre	Wuhan	China	13	13	0	No	30.5	n.r.	n.r.	21.9	23.1	Pregnancy	23	22	Positive	CT	61.5	69.2	23	15	n.r.	38	100	100	62	23	n.r.	n.r.	No	100	No	No	37	20	80	40	n.r.	2962	9.8	No	No	No	60
Liao J	2020	2020-01-20	2020-03-02	Case control study	Single-centre	Wuhan	China	10	9	1	No	31.9	n.r.	n.r.	n.r.	40	Pregnancy	n.r.	38+5	Positive	CT	100	90	n.r.	90	n.r.	n.r.	n.r.	n.r.	n.r.	n.r.	n.r.	n.r.	No	n.r.	n.r.	No	38+5	100	0	10	n.r.	3283	n.r.	No	No	No	n.r.
Cao D	2020	2020-01-23	2020-02-23	Case series	Multicenter	Wuhan	China	10	7	3	No	30.3	n.r.	20	n.r.	n.r.	Pregnancy and puerperium	80	38	Positive	CT	100	70	20	60	n.r.	10	n.r.	n.r.	n.r.	n.r.	n.r.	n.r.	No	n.r.	No	No	38	20	80	30	n.r.	3063	10	No	No	No	n.r.
Khoury R	2020	2020-03-13	2020-04-12	Case series	Multicenter	New York	USA	241	93	148	Yes	32	n.r.	55.1	≥ 30 55.1%	29.5	Pregnancy	17	25-42	Positive	Chest X-ray	20.7	n.r.	n.r.	n.r.	n.r.	n.r.	n.r.	n.r.	n.r.	n.r.	n.r.	n.r.	7.1	n.r.	3.7	0	39	58.5	41.5	18.9	25.7	3135	9	n.r.	0.82	2.5	n.r.
London V	2020	2020-03-15	2020-04-15	Case series	Single-centre	New York	USA	68	46	22	Yes	30	n.r.	30.9	31.2	29.4	Pregnancy	19.1	>=37 95.6	Positive	Chest X-ray	10.3	n.r.	n.r.	47.1	0	n.r.	n.r.	n.r.	23.5	n.r.	n.r.	n.r.	n.r.	21.8	1.8	0	>=37 78.2	60	40	21.9	n.r.	n.r.	n.r.	n.r.	0	No	n.r.
Gulersen M	2020	2020-03-13	2020-04-24	Case series	Multicenter	New York	USA	65	51	14	Yes	31.7	n.r.	16.9	31.5	35.4	Pregnancy	n.r.	32	Positive	Chest X-ray	n.r.	n.r.	n.r.	n.r.	n.r.	n.r.	n.r.	n.r.	21.5	6.2	n.r.	n.r.	n.r.	n.r.	n.r.	n.r.	>=37 61.5	n.r.	n.r.	38.5	n.r.	n.r.	n.r.	n.r.	n.r.	n.r.	n.r.
Pierre-Williams R	2020	2020-03-05	2020-04-20	Case series	Multicenter	Pennsylvania, NYC, New Yersey, Ohio	USA	64	64	0	No	33.2	n.r.	25	33.5	28	Pregnancy	8	30	Positive	Chest X-ray	100	n.r.	n.r.	n.r.	n.r.	n.r.	n.r.	25	56	23	74	n.r.	31.3	81	30	0	34.5	25	75	45.3	63.6	2403	7.9	n.r.	0	3	n.r.
Lokken E	2020	2020-01-21	2020-04-17	Case series	Multicenter	Washington	USA	46	43	3	No	29	2.2	26.1	≥ 25 64.3%	26.1	Pregnancy	8.7	27	Positive	Chest X-ray	17.4	n.r.	n.r.	33	n.r.	n.r.	n.r.	6.5	4.3	n.r.	n.r.	n.r.	2.2	n.r.	2.2	0	38.4	62.5	37.5	12.5	n.r.	n.r.	n.r.	n.r.	2.2	n.r.	n.r.
Breslin N	2020	2020-03-13	2020-03-27	Case series	Multicenter	New York	USA	43	29	14	Yes	29.7	n.r.	41.5	30.9	n.r.	Pregnancy	n.r.	37	Positive	Chest X-ray	n.r.	n.r.	n.r.	n.r.	n.r.	n.r.	11.6	n.r.	7.0	n.r.	n.r.	n.r.	4.7	n.r.	n.r.	0	n.r.	55.6	44.4	n.r.	16.7	n.r.	9	n.r.	0	No	n.r.
Qadri F	2020	2020-03-26	2020-04-10	Case series	Single-centre	Michigan	USA	16	4	12	Yes	20-40	n.r.	n.r.	≥ 30 62.5%	n.r.	Pregnancy	n.r.	22-40	Positive	Chest X-ray	25	n.r.	n.r.	n.r.	n.r.	n.r.	n.r.	12.5	12.5	12.5	n.r.	n.r.	0	12.5	0	0	n.r.	66	33.3	12	n.r.	2830-4215	9	0	0	No	50
Kayem G	2020	2020-03-01	2020-04-14	Case series	Multicenter	33 centers	France	617	497	120	No	>35 31.4%	2.6	16.5	≥ 30 22.5%	n.r.	Pregnancy	14.9	22-31 38.6%	Positive	CT	n.r.	n.r.	n.r.	n.r.	n.r.	n.r.	n.r.	n.r.	n.r.	n.r.	n.r.	n.r.	n.r.	15.1	4.7	0.2	>=37 72.4%	51.9	48.1	27.6	19.5	n.r.	n.r.	n.r.	1.3	1.1	n.r.
Vivanti A	2020	2020-03-12	2020-04-13	Case series	Multicenter	Paris	France	100	99	1	No	33.7	2	22	27	n.r.	Pregnancy	n.r.	33.3	Positive	CT	n.r.	n.r.	n.r.	36.2	n.r.	n.r.	n.r.	n.r.	n.r.	n.r.	n.r.	n.r.	8	10	9	0	37.9	51.5	48.5	39	28	n.r.	<7 11%	n.r.	0	3	n.r.
Cohen J	2020	n.r.	n.r.	Case series	Multicenter	Paris	France	88	88	0	No	31	3.4	2.3	22.7	n.r.	Pregnancy	5.7	27	Positive	CT	n.r.	n.r.	n.r.	n.r.	n.r.	n.r.	n.r.	n.r.	n.r.	n.r.	n.r.	n.r.	n.r.	7	n.r.	0	n.r.	64	35.7	n.r.	n.r.	n.r.	n.r.	n.r.	n.r.	n.r.	n.r.
Sentilhes L	2020	2020-03-01	2020-04-03	Case series	Single-centre	Strasbourg	France	54	54	0	No	30.6	1.9	18.5	25.3	27.3	Pregnancy	11.1	30.4	Positive	CT	83.3	n.r.	n.r.	44.4	0	n.r.	n.r.	5.6	7.4	0	n.r.	n.r.	9.3	24.1	5.6	0	37.4	57.1	42.9	23.8	14.3	2800	<7 0%	n.r.	0	0	n.r.
Knight M	2020	2020-03-01	2020-04-14	Case series	Multicenter	194 centers	UK	427	427	0	No	20-34 (58%); ≥ 35 (41%)	n.r.	34	≥ 25 69%	37.5	Pregnancy	12	34	Positive	Chest X-ray	n.r.	n.r.	n.r.	n.r.	n.r.	n.r.	n.r.	2	n.r.	15	n.r.	n.r.	10	n.r.	10	1.2	38	40	59.5	25.2	25.3	n.r.	n.r.	n.r.	1	5	n.r.
Antoun L	2020	2020-02-01	2020-04-30	Case series	Single-centre	Birmingham	UK	23	23	0	No	29.3	n.r.	n.r.	n.r.	n.r.	Pregnancy	48	33	Positive	Chest X-ray	100	n.r.	n.r.	n.r.	n.r.	n.r.	n.r.	n.r.	n.r.	26.3	n.r.	n.r.	17.4	n.r.	13	4.3	38	15.8	84.2	36.8	n.r.	3139	9.3	4.8	No	No	n.r.
Martínez O	2020	2020-03-12	2020-04-06	Case series	Multicenter	96 centers	Spain	82	60	22	Yes	34.1	7.3	39	24.4	31.7	Pregnancy	6.1	n.r.	Positive	Chest X-ray	28.0	n.r.	n.r.	8.5	n.r.	n.r.	n.r.	n.r.	n.r.	n.r.	n.r.	n.r.	11	13.4	7.3	n.r.	37.6	50	50	30.5	26.8	3049	<5 3.7%	7.3	0	2.4	51.2
Pereira A	2020	2020-03-14	2020-04-14	Case series	Single-centre	Madrid	Spain	60	45	15	Yes	34	n.r.	n.r.	n.r.	45	Pregnancy	18.3	32	Positive	Chest X-ray	30	n.r.	10	40	15	20	65	18.3	65	15	41.7	n.r.	1.7	10	0	0	>=37 91.3%	78	21.7	8.7	n.r.	n.r.	n.r.	n.r.	0	0	91.3
Savasi S	2020	2020-02-23	2020-03-28	Case series	Multicenter	12 centers	Italy	77	57	20	No	32	1	32	22.8	40	Pregnancy and puerperium	n.r.	37	Positive	Chest X-ray	70	n.r.	n.r.	29	n.r.	39	n.r.	38	43	n.r.	39	n.r.	8	29	3.9	No	39	61	38.6	21	9	3160	10	No	No	No	100
Ferrazzi E	2020	2020-03-01	2020-03-20	Case series	Multicenter	4 centers	Italy	42	42	0	No	32.9	n.r.	n.r.	n.r.	35.8	Pregnancy and puerperium	14	>=37 71.4	Positive	Chest X-ray	45.2	n.r.	38.2	24.2	n.r.	n.r.	n.r.	n.r.	n.r.	n.r.	n.r.	n.r.	21.1	36.8	n.r.	No	>=37 71.4	57.1	42.9	26.2	7.1	3084	n.r.	4.8	No	7.1	26.2

## Sheet: Table 2
		Selection	Ascertainment	Causality	Reporting
COUNTRY	AUTOR
China	Chen S	★	★ ★	★	★
China	Yan J	★	★ ★	★	★
China	Wu Y	★	★ ★	★	★
China	Qiancheng X,	★	★ ★	★	★
China	Wu X	★	★ ★	★	★
China	Chen Y	★	★ ★	★	★
China	Liu W	★	★ ★	★	★
China	Zhang L	★	★ ★	★	★
China	Wei L	★	★ ★	★ ★	★
China	Khan S	★	★ ★	★	★
China	Chen R	★	★ ★	★	★
China	Zhang L	★	★ ★	★	★
China	Zeng Y	★	★ ★	★	★
China	Li N	★	★ ★	★	★
China	Liu D	★	★ ★	★	★
China	Liu Y	★	★ ★	★	★
China	Yan H	★	★ ★	★	★
China	Wu Y	★	★ ★	★	★
China	Liao J	★	★ ★	★	★
China	Cao D	★	★ ★	★	★
USA	Khoury R	★	★ ★	★	★
USA	London V	★	★ ★	★	★
USA	Gulersen M	★	★ ★	★	★
USA	Pierre-Williams R	★	★ ★	★	★
USA	Lokken E	★	★ ★	★	★
USA	Breslin N	★	★ ★	★ ★	★
USA	Qadri F	★	★ ★	★	★
France	Kayem G	★	★ ★	★	★
France	Vivanti A	★	★ ★	★	★
France	Cohen J	★	★ ★	★	★
France	Sentilhes L	★	★ ★	★	★
UK	Knight M	★	★ ★	★ ★	★
UK	Antoun L	★	★ ★	★	★
Spain	Martínez O	★	★ ★	★	★
Spain	Pereira A	★	★ ★	★	★
Italy	Savasi S	★	★ ★	★	★
Italy	Ferrazzi E	★	★ ★	★	★
Portugal	Doria M	★	★ ★	★	★
